# Supplementary material for: Identifying Inhibitors of −1 Programmed Ribosomal Frameshifting in a Broad Spectrum of Coronaviruses
Source: MDPI journal article supplement (doi:10.3390/v14020177), 2022-01-18
Supplement: s1 [file s1]

**Supplementary Material for:**

## **Identifying inhibitors of –1 programmed ribosomal frameshifting in a broad spectrum of coronaviruses**

Sneha Munshi,<sup>1†</sup> Krishna Neupane,<sup>1†</sup> Sandaru M. Ileperuma,<sup>1</sup> Matthew T.J. Halma,<sup>1</sup> Jamie A. Kelly,<sup>2</sup> Clarissa F. Halpern,<sup>2</sup> Jonathan D. Dinman,<sup>2\*</sup> Sarah Loerch,<sup>3‡\*</sup> Michael T. Woodside<sup>1,4\*</sup>

<sup>1</sup>*Department of Physics, University of Alberta, Edmonton AB T6G 2E1 Canada*

<sup>2</sup>*Department of Cell Biology and Molecular Genetics, University of Maryland, College Park MD 20742 USA*

<sup>3</sup>*Janelia Research Campus, Howard Hughes Medical Institute, Ashburn VA 20147 USA*

<sup>4</sup>*Li Ka Shing Institute of Virology, University of Alberta, Edmonton AB T6G 2E1 Canada*

<sup>‡</sup>*Current address: Department of Chemistry and Biochemistry, University of California, Santa Cruz, Santa Cruz CA 95064 USA*

<sup>†</sup>These authors contributed equally

<sup>\*</sup>Correspondence to: Jonathan Dinman (dinman@umd.edu), Sarah Loerch (sloerch@ucsc.edu), Michael Woodside (michael.woodside@ualberta.ca)

**This PDF file includes:**

Supplementary Tables 1–5

Supplementary Figures 1–5

**Table S1: Frameshift signal sequences for panel used in testing inhibitors.** Slippery sequence is underlined, spacer is shown in italic font.

| Name       | Sequence                                                                                                             |
|------------|----------------------------------------------------------------------------------------------------------------------|
| KU182958   | TTTTTAAACGAGTCAGGGGTACTAGTGGAGTAGCCCGTCTAGTACCCCTAGGTTCTGGTGTAGAACAGATATTGTATTAAGGGCTTT                              |
| LC469308   | TTTTTAAACGAGTCCGGGGTTCTATTGTAAATGCCCGAATAGAACCCTGTGCTAGTGGACTTTCCACTGATGTCGTTTTTAGGGCATT                             |
| KY770854   | TTTTTAAACGAGTGCGGGGCTCTAGTGATGCTCGACTAGAGCCCCTTAATGGCACTGACACTGACAAGTGTGTTCTGTGCTTTTGACGTTTACAACAAGGATGTTGCATGTATTGG |
| KF294282   | TTTTTAAACGAGTGCGGGGCTCTAGTGACGCTCGACTAGAGCCCTGTAATGGTACTGAACCTGAGCATGTGATTTCGCGCCTT                                  |
| MERS-CoV   | TTTTTAAACGAGTCCGGGGTTCTATTGTAAATGCCCGAATAGAACCCTGTTCAAGTGGTTTGTCCACTGATGTCGTCCTTTAGGGCATT                            |
| SARS-CoV-2 | TTTTTAAACGGGTTTGCGGTGTAAGTGCAGCCCGTCTTACACCGTGCGGCACAGGCACTAGTACTGATGTCGTATACAGGGCTT                                 |
| PEMV       | TTTTTAAACGGGTAATTCCGGTCGACTCCGGAGAAACAAAGTCAATA                                                                      |
| HIV        | AATTTTTTAGGGAAGATCTGGCCTTCCACAAAGGGAAGGCCAGGGAATTTTCTTC                                                              |

**Table S2: Hits from initial screen of drug library.**

| Hits altering only -1 PRF |                    | Hits altering -1 PRF and general translation |              |
|---------------------------|--------------------|----------------------------------------------|--------------|
| Febuxostat                | Fostamatinib       | Plerixafor                                   | Azatadine    |
| Tranilast                 | Erdaftinib         | Idebenone                                    | Ketoconazole |
| Bepiridil                 | 10-undecenoic acid | Ibudilast                                    | Abemaciclib  |
| Tafamidis                 | Santonin           | Cariprazine                                  | Ibrutinib    |
| Brexipirazole             | Garenoxacin        | Pasireotide                                  | Maraviroc    |
| Penbutolol                | Cefmenoxime        | Bremelanotide                                | Nelfinavir   |
| Benzocaine                | Tetracycline       | Diclofenac                                   | Ribostamycin |
| Omargliptin               | Piromidic acid     | Desloratadine                                | Streptomycin |
| Nafamostat                | Dapsone            |                                              | Azithromycin |
| Indinavir                 | Demeclocycline     |                                              |              |
| Nitazoxanide              | Valnemulin         |                                              |              |
| Palbociclib               | Raltitrexed        |                                              |              |

**Table S3: Oligonucleotides for bi-fluorescent reporter construction.** Underlined bases in gBlock denote HIV-1 -1 PRF signal, lower-case bases in  $\alpha$ -helix spacer denote linkers complementary to restriction sites for cloning.

| Oligo name                                        | Sequence                                                                                                                                                                                                                                                                                                                                                                                                                                                                                                                                                                                                                                                                      |
|---------------------------------------------------|-------------------------------------------------------------------------------------------------------------------------------------------------------------------------------------------------------------------------------------------------------------------------------------------------------------------------------------------------------------------------------------------------------------------------------------------------------------------------------------------------------------------------------------------------------------------------------------------------------------------------------------------------------------------------------|
| AcGFP1, mCherry, inteins, and HIV-1 -1 PRF gBlock | GCATCAGAGCAGATTGTACTGAGAGTGCACCATCTAGGGCGCGCCGGTACCGGTTCCAAGCTTGTTGACGCTAGCCTGCAGGCGGCCGCTAATACGACTCACTATAGGGCCACCATGGTGAGCAAGGGCGCCGAGCTGTTACCGGCATCGTGCCCATCCTGATCGAGCTGAATGGCGATGTGAATGGCCACAAGTTCAGCGTGAGCGGCGAGGGCGAGGGCGATGCCACCTACGGCAAGCTGACCCTGAAGTTCTGCTACCCACCGGCAAGCTGCCTGTGCCCTGGCCACCCTGGTGACCACCCTGAGCTACGGCGTGCAAGTGCTTCTACGCTACCCCGATCATGAAGCAGCACGACTTCTTCAAGAGCGCCATGCCTGAGGGCTACATCCAGGAGCGCACCATCTTCTTCGAGGATGACGGCAACTACAAGTCGCGCGCCGAGGTGAAGTTCGAGGGCGATAACCCTGGTG AATCGCATCGAGCTGACCGGCACCGATTTC AAGGAGGATGGCAACATCCTGGGCAATAAGATGGAGTACAACACAACGCCACAATGTGTACATCATGACCGACAAGGCCAAGAATGGCATCAAGGTGAAGTTCAAGATCCGCCACAACATCGAGGATGGCAGCGTGACGCTGGCCGAC |

|                             |                                                                                                                                                                                                                                                                                                                                                                                                                                                                                                                                                                                                                                                                                                                                                                                                                                                                                                                                                                                                                                                                                                                                                                                                                                                                                                                                                                                                                                                                                                              |
|-----------------------------|--------------------------------------------------------------------------------------------------------------------------------------------------------------------------------------------------------------------------------------------------------------------------------------------------------------------------------------------------------------------------------------------------------------------------------------------------------------------------------------------------------------------------------------------------------------------------------------------------------------------------------------------------------------------------------------------------------------------------------------------------------------------------------------------------------------------------------------------------------------------------------------------------------------------------------------------------------------------------------------------------------------------------------------------------------------------------------------------------------------------------------------------------------------------------------------------------------------------------------------------------------------------------------------------------------------------------------------------------------------------------------------------------------------------------------------------------------------------------------------------------------------|
|                             | CACTACCAGCAGAATACCCCCATCGGCGATGGCCCTGTGCTGCTGCCCCGATAACCACTAC<br>CTGTCCACCCAGAGCGCCCTGTCCAAGGACCCCAACGAGAAGCGCGATCACATGATCTAC<br>TTCGGCTTCGTGACCGCCGCCGCCATCACCCACGGCATGGATGAGCTGTACAAGTATTTTC<br>TACACCTCGAGAGAAGCCAGACACAAACAGAAAATTGTGGCACCCGGTGAAACAGACTTTG<br>AATTTTGACCTTCTTAAGCTGGCGGGAGACGTCGAGTCCAACCCCGGGCCCTcGTCGACTT<br>TTTTAGGGAAGATCTGGCCTTCCCACAAGGGGAGGCCAGGGAATTTTCTTCCGAGCTCGA<br>AGACGCCAAAAACATAAAGAAAGGCCCGCGCCATTCTATCCTCTAGAGGATGGAACCGC<br>TGGAGAGCAACTGCATAAGGCTGGATCCGAGGACGGCATAAGCAAAAGATCGTAGCCCC<br>AGTAAAGCAAACACTCAACTTCGATCTACTCAAACCTCGCAGGTGATGTGGAATCTAATCCA<br>GGACCTTTTCGGATCTGCCACCATTATCGTGAGCAAGGGCGAGGAGGATAACATGGCCATC<br>ATCAAGGAGTTTCATGCGCTTCAAGGTGCACATGGAGGGCTCCGTGAACGGCCACGAGTTT<br>GAGATCGAGGGCGAGGGCGAGGGCCGCCCTACGAGGGCACCCAGACCCGCCAAGCTGA<br>AGGTGACCAAGGGTGGCCCCCTGCCCTTCGCCTGGGACATCCTGTCCCCTCAGTTCATGT<br>ACGGCTCCAAGGCCTACGTGAAGCACCCCGCCGACATCCCGACTACTTGAAGCTGTCCT<br>TCCCCGAGGGCTTCAAGTGAGGAGCGCGTGATGAACTTCGAGGACGGCGGCGTGGTGACC<br>GTGACCCAGGACTCCTCCCTCCAGGACGGCGAGTTCATCTACAAGGTGAAGCTGCGCGG<br>CACCAACTTCCCCTCCGACGGCCCCGTAATGCAGAAGAAGACAATGGGCTGGGAGGCCT<br>CCTCCGAGCGGATGTACCCCGAGGACGGCGCCCTGAAGGGCGAGATCAAGCAGAGGCTG<br>AAGCTGAAGGACGGCGGCCACTACGACGCTGAGGTCAAGACCACCTACAAGGCCAAGAA<br>GCCCCGTGCAGCTGCCCGGCGCCTACAACGTCAACATCAAGTTGGACATCACCTCCCACAA<br>CGAGGACTACACCATCGTGGAACAGTACGAACGCGCCGAGGGCCGCCACTCCACCGGCG<br>GCATGGACGAGCTGTACAAGTAGTTAATTAATAAATAAATATCTTTATTTTCATTACATCTGTG<br>TGTTGGTTTTTTGTGTGGTTTAGAGCGAGATTCCGTCTCAA |
| α-helix<br>spacer<br>top    | tcgactcGAAGCAGCCGCTAAAGAGGCTGCGGC AAAAGCTg                                                                                                                                                                                                                                                                                                                                                                                                                                                                                                                                                                                                                                                                                                                                                                                                                                                                                                                                                                                                                                                                                                                                                                                                                                                                                                                                                                                                                                                                   |
| α-helix<br>spacer<br>bottom | GATCCAGCTTTTGCCGCAGCCTCTTTAGCGGCTGCTTCGAG                                                                                                                                                                                                                                                                                                                                                                                                                                                                                                                                                                                                                                                                                                                                                                                                                                                                                                                                                                                                                                                                                                                                                                                                                                                                                                                                                                                                                                                                    |

**Table S4: Library used for drug screening.** Details of the drugs included in the screening library are available in the attached spreadsheet (TableS4.xlsx).

**Table S5: Effects of –1 PRF inhibitors on general translation.** The change in *Renilla* luciferase signal with drug present compared to that with drug absent was used to assay the effect of the inhibitors on general translation. Errors represent s.e.m. from 4 replicates.

| Compound    | Change in <i>Renilla</i> luciferase signal (%) |
|-------------|------------------------------------------------|
| Nafamostat  | –47 ± 9                                        |
| Abemaciclib | –29 ± 5                                        |
| Palbociclib | 4 ± 15                                         |
| Valnemulin  | –28 ± 7                                        |

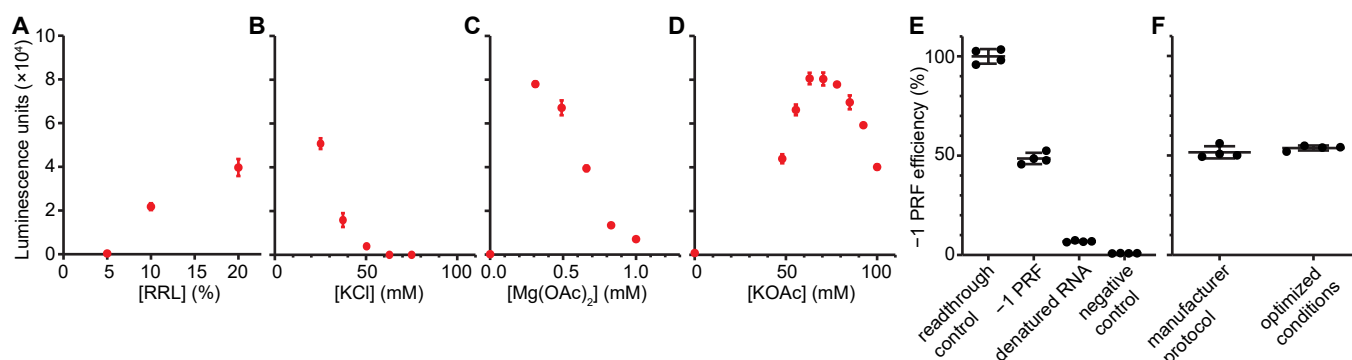

**Figure S1: Optimization of dual-luciferase assay for high-throughput screening of -1 PRF in SARS-CoV-2.** The following were sequentially optimized: (A) RRL content, (B) potassium chloride concentration, (C) magnesium acetate concentration, and (D) potassium acetate concentration. Each condition was measured in triplicate. (E) Using optimized conditions, ~50% -1 PRF efficiency was measured for the SARS-CoV-2 frameshift signal. -1 PRF was dependent on RNA structure: thermally denaturing RNA for 5 min at 95 °C followed by snap cooling on ice reduced -1 PRF efficiency to near zero. (F) Optimized conditions with 20% RRL have the same -1 PRF efficiency as reactions using the manufacturer protocol with 70% RRL (unpaired t-test with Welch's correction,  $p = 0.26$ ).

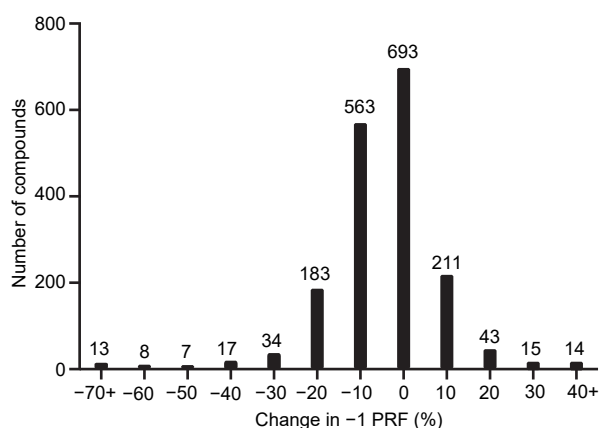

**Figure S2: Results of drug-library screening.** Distribution of effect sizes for change in -1 PRF using the SARS-CoV-2 frameshift reporter.

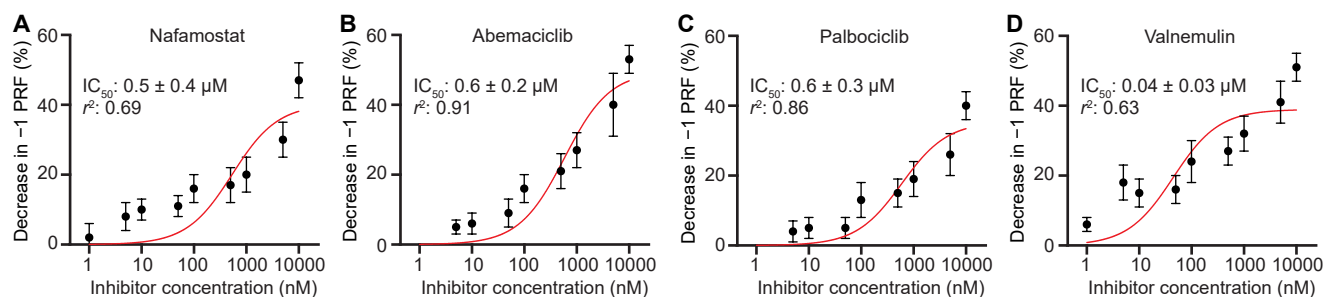

**Figure S3: Dose-response curves for -1 PRF inhibition by compounds found in screen.** Dose-response curves for (A) nafamostat, (B) abemaciclib, (C) palbociclib, and (D) valnemulin were fit to the Hill equation with slope 1 to find IC<sub>50</sub>. Error bars represent standard error on the mean from 6 replicates.

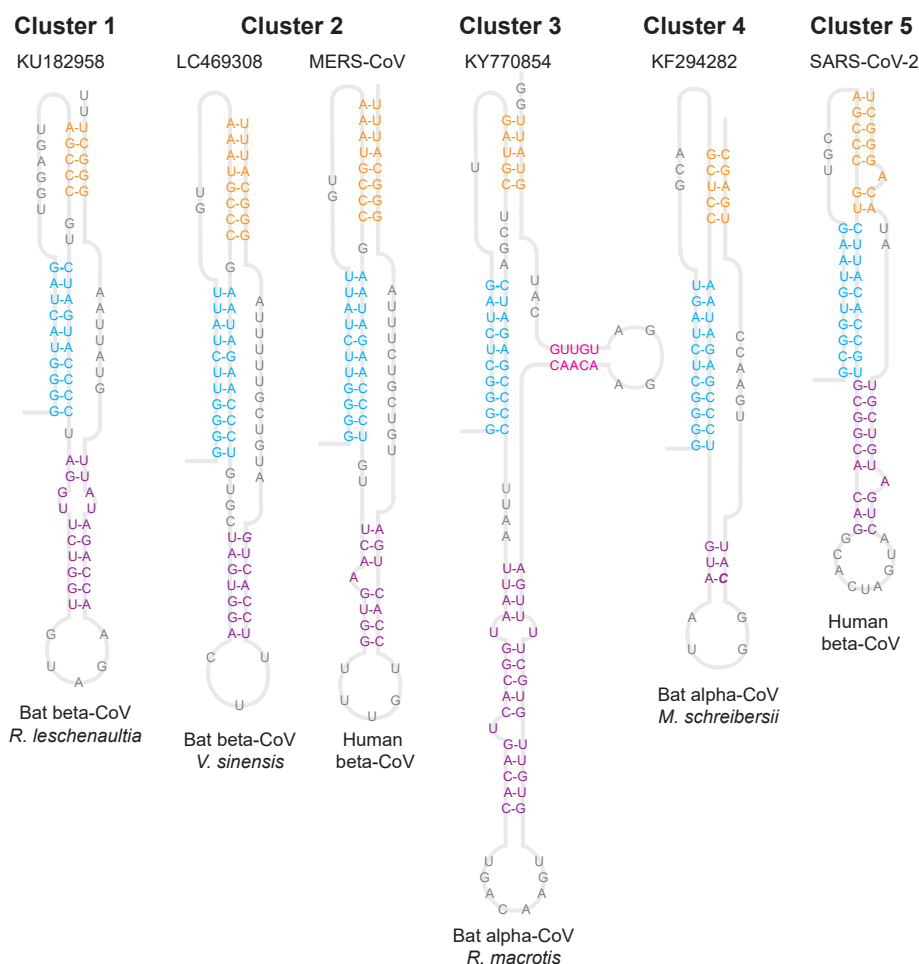

**Figure S4: Secondary structure predictions for pseudoknots.** Lowest-energy consensus structures homologous to the structures of the SARS-CoV and SARS-CoV-2 pseudoknots. Stem 1: cyan, stem 2: orange, stem 3: purple, stem 4: magenta, loops: grey.

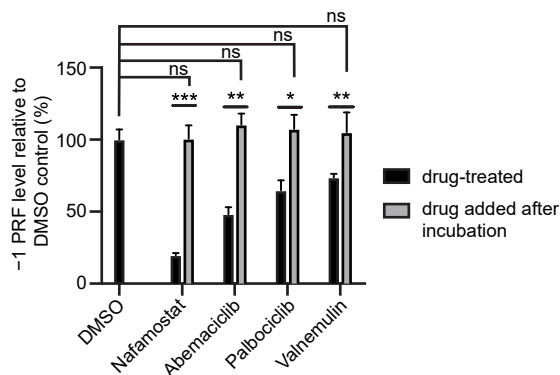

**Figure S5: Testing for selective inhibition of firefly luciferase.** The compounds from the drug screen that were used in testing against the panel of CoV frameshift signals did not selectively inhibit firefly luciferase: adding the drugs after incubating the translation product with luciferase assay reagents did not alter the firefly:*Renilla* luminescence ratio compared to the untreated case (unpaired t-test with Welch's correction,  $p = 0.17-0.95$ ) and yielded a significantly different  $-1$  PRF level compared to adding the drugs before translation ( $p = 0.019$  to less than  $0.0001$ ).
